# Supplementary material for: IL-2 promotes early Treg reconstitution after allogeneic hematopoietic cell transplantation
Source: PubMed Central journal article supplement — Haematologica. 2017 May;102(5):948–57. doi: 10.3324/haematol.2016.153072 (PMC5477614; doi:10.3324/haematol.2016.153072), 2017-05
Supplement: 2016_153072-Disclosures_and_Contributions.pdf [file 2016_153072-Disclosures_and_Contributions.pdf]

Haematologica  
HAEMATOL/2016/153072  
Version 4

IL-2 promotes early Treg reconstitution after allogeneic hematopoietic  
cell transplantation

Brian C. Betts, Joseph Pidala, Jongphil Kim, Asmita Mishra, Taiga Nishihori, Lia Perez, Jose Leonel Ochoa-Bayona, Farhad Khimani, Kelly Walton, Ryan Bookout, Michael Nieder, Divis K. Khaira, Marco Davila, Melissa Alsina, Teresa Field, Ernesto Ayala, Frederick L. Locke, Marcie Riches, Mohamed Kharfan-Dabaja, Hugo Fernandez, and Claudio Anasetti

Disclosures: No competing financial interests to declare.

Contributions: B.C.B. designed/performed experiments, analyzed data, and wrote the manuscript. J.P. and C.A. interpreted data and edited the manuscript. J.K. analyzed data. A.M., T.N., H.F., L.P., J.L.O-B., F.L.L., T.F., M.N., D.K.K., M.R, M.D., M.A., T.F., E.A., M. K-D., and F.K. enrolled patients, managed patient care, reported data, and/or edited the manuscript. K.W. assisted with experiments. R.B. designed and coordinated pharmacy care.
