# Supplementary material for: IL-2 promotes early Treg reconstitution after allogeneic hematopoietic cell transplantation
Source: PubMed Central journal article supplement — Haematologica. 2017 May;102(5):948–57. doi: 10.3324/haematol.2016.153072 (PMC5477614; doi:10.3324/haematol.2016.153072), 2017-05
Supplement: HAEMATOL-2016-153072v4-Betts-01-01.pdf [file HAEMATOL-2016-153072v4-Betts-01-01.pdf]

# IL-2 promotes early Treg reconstitution after allogeneic hematopoietic cell transplantation

Phase II study between 4/16/2014-12/19/2015

After HLA matched related or unrelated allogeneic hematopoietic cell transplantation

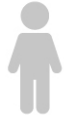

- 13 Acute myeloid leukemia
- 2 Myelodysplastic syndrome
- 1 Chronic myeloid leukemia
- 4 Acute lymphoblastic leukemia

- Interleukin-2 (200,000IU/m<sup>2</sup> thrice weekly, days 0 to +90)
- +
- Sirolimus (5-14ng/ml)
- +
- Tacrolimus (3-7ng/ml)

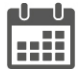

day 30

**Adding interleukin-2 to sirolimus/tacrolimus significantly increased regulatory T-cells**

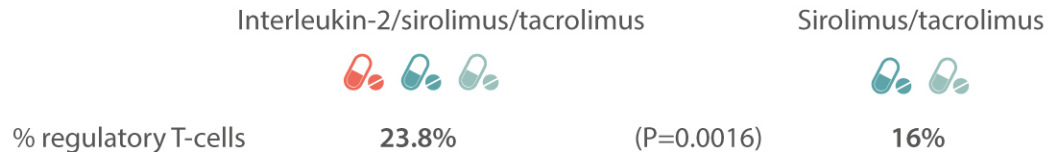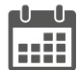

day 90

**Adding interleukin-2 to sirolimus/tacrolimus leads to a fall in regulatory T-cells and no reduction of acute or chronic graft-versus-host disease**

The accumulation of interleukin-2 receptors in circulation over time may neutralize interleukin-2
